# Supplementary material for: Molecular epidemiology and antimicrobial susceptibility of diarrheagenic Escherichia coli isolated from children under age five with and without diarrhea in Central Ethiopia
Source: PubMed Central journal article supplement (PMC10348587; doi:10.1371/journal.pone.0288517), 2023-07-14

1 2 3 4 5 6 7 8 9 10 11 x

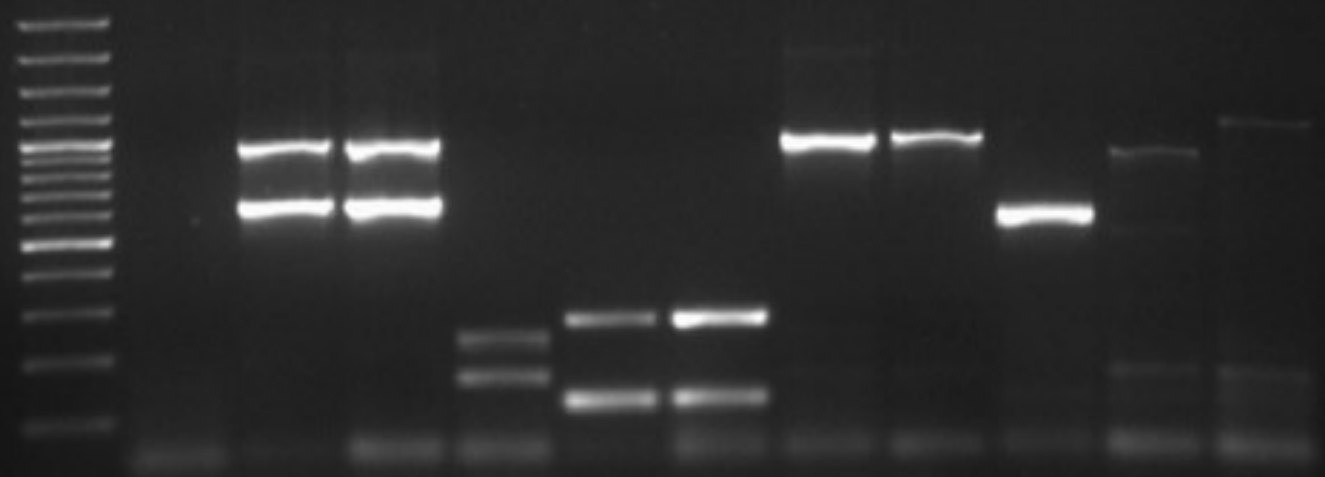

x x x x x x x x x x x x x x

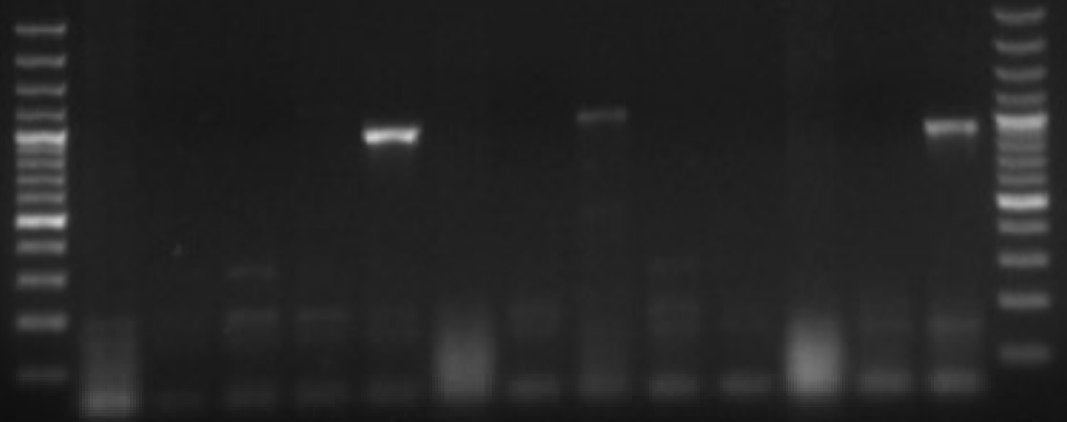

Supplement: pone.0288517.s004.pdf [file pone.0288517.s004.pdf]
